# Supplementary material for: Ultrasound-Guided Abrams Pleural Biopsy vs CT-Guided Tru-Cut Pleural Biopsy in Malignant Pleural Disease, a 3-Year Follow-up Study
Source: Springer Nature journal article supplement (doi:10.1007/s00408-016-9933-9), 2016-08-19
Supplement: MOESM1 [file 10602102]

Supplementary Table S1: Malignant diagnoses in the two cohorts

|                                   | Ultrasound Guided<br>Abrams Group | CT Guided Tru-<br>Cut Group |
|-----------------------------------|-----------------------------------|-----------------------------|
| Non-small cell carcinoma          | 15                                | 6                           |
| Breast carcinoma                  | 5                                 | -                           |
| Mesothelioma                      | 6                                 | 6                           |
| Small cell lung carcinoma         | 1                                 | 1                           |
| Thyroid carcinoma                 | -                                 | 1                           |
| Malignant melanoma                | -                                 | 1                           |
| Colorectal carcinoma              | -                                 | 1                           |
| Upper GI carcinoma                | -                                 | 2                           |
| Renal cell carcinoma              | -                                 | 1                           |
| Bladder carcinoma                 | -                                 | 1                           |
| B Cell Lymphoma                   | -                                 | 1                           |
| Cutaneous T Cell Lymphoma         | -                                 | 1                           |
| Mantle cell Lymphoma              | 1                                 | -                           |
| Endometrial                       | 1                                 | -                           |
| Epitheloid haemangioendothelioma  | 1                                 | -                           |
| Adenocarcinoma of unknown primary | 2                                 | -                           |
| Ovarian                           | 1                                 | -                           |
| Clinical diagnosis of malignancy  | 2                                 | 0                           |
