# Supplementary material for: Ultrasound-Guided Abrams Pleural Biopsy vs CT-Guided Tru-Cut Pleural Biopsy in Malignant Pleural Disease, a 3-Year Follow-up Study
Source: Springer Nature journal article supplement (doi:10.1007/s00408-016-9933-9), 2016-08-19
Supplement: MOESM2 [file 10602102]

Supplementary Table 2: Indications for CT Biopsy

| Indication for CT Biopsy      | Number     |
|-------------------------------|------------|
| Focal pleural nodule / lesion | 19 (65.5%) |
| Pleural thickening            | 10 (34.5%) |
